# Supplementary material
Source: PubMed Central journal article supplement (PMC5497310)
Supplement: NIHMS866031-supplement-supplemental.pdf [file NIHMS866031-supplement-supplemental.pdf]

**Appendix. Results of literature searches on #1 population-based studies on sodium intake and on #2 sodium intake and health.**

**#1. Population-based studies on sodium intake**

| # ▲ | Searches                                                                                                                                                                                                                                                                                                                                                                                                                                                      | Results  |
|-----|---------------------------------------------------------------------------------------------------------------------------------------------------------------------------------------------------------------------------------------------------------------------------------------------------------------------------------------------------------------------------------------------------------------------------------------------------------------|----------|
| 1   | ((sodium or salt or NaCl) adj2 (intake\$ or diet\$ or consumption or consume\$ or excret\$ or secretion or concentration or content or urin\$)).mp. [mp=title, abstract, original title, name of substance word, subject heading word, keyword heading word, protocol supplementary concept, rare disease supplementary concept, unique identifier]                                                                                                           | 51328    |
| 2   | (measure\$ or record\$ or diary or collection\$ or data or method\$ or sample\$ or survey\$ or surveillance or study or studies or trial\$ or evaluation\$ or epidemiolog\$ or estimat\$ or intervention\$ or review\$ or pattern\$ or trend\$ or cohort).mp. [mp=title, abstract, original title, name of substance word, subject heading word, keyword heading word, protocol supplementary concept, rare disease supplementary concept, unique identifier] | 14020987 |
| 3   | (population\$ or cultural or cross-section\$ or global or trend\$ or world or countr\$ or national or international or public health or Europe\$ or Asia\$ or (North adj America\$) or ((South or Latin) adj America\$) or Africa\$).mp. [mp=title, abstract, original title, name of substance word, subject heading word, keyword heading word, protocol supplementary concept, rare disease supplementary concept, unique identifier]                      | 3051985  |
| 4   | 1 and 2 and 3                                                                                                                                                                                                                                                                                                                                                                                                                                                 | 5747     |
| 5   | limit 4 to yr="2009 -Current"                                                                                                                                                                                                                                                                                                                                                                                                                                 | 1970     |

## #2. Sodium intake and health outcomes

| # ▲ | Searches                                                                                                                                                                                                                                                                                                                                                                                                                                                                                                                                                                                                                                                                                                            | Results |
|-----|---------------------------------------------------------------------------------------------------------------------------------------------------------------------------------------------------------------------------------------------------------------------------------------------------------------------------------------------------------------------------------------------------------------------------------------------------------------------------------------------------------------------------------------------------------------------------------------------------------------------------------------------------------------------------------------------------------------------|---------|
| 1   | ((sodium or salt or NaCl) adj2 (intake\$ or diet\$ or consumption or consume\$ or concentration or content or excret\$ or secret\$)).mp. [mp=title, abstract, original title, name of substance word, subject heading word, keyword heading word, protocol supplementary concept, rare disease supplementary concept, unique identifier]                                                                                                                                                                                                                                                                                                                                                                            | 49892   |
| 2   | ((blood adj pressure) or hypertension or coronary or heart or cardio\$ or cardia\$ or myocardial or (lateral adj medullary) or angina or triglycerides or (lipid adj (blood or metabolism)) or stroke or shock or kidney or brain or cerebral or cerebrovascular or dementia or STEMI or NSTEMI or (nervous adj system\$) or cholesterol or HDL or LDL or swelling or weight or edema or renal or catecholamine\$ or atherosclerosis or (health adj outcome\$) or death\$ or mortality or morbidity or fatal\$).mp. [mp=title, abstract, original title, name of substance word, subject heading word, keyword heading word, protocol supplementary concept, rare disease supplementary concept, unique identifier] | 6057565 |
| 3   | ((randomized or controlled or clinical\$) adj2 (trial\$ or test\$ or stud\$)).mp. [mp=title, abstract, original title, name of substance word, subject heading word, keyword heading word, protocol supplementary concept, rare disease supplementary concept, unique identifier]                                                                                                                                                                                                                                                                                                                                                                                                                                   | 1261839 |
| 4   | 1 and 2 and 3                                                                                                                                                                                                                                                                                                                                                                                                                                                                                                                                                                                                                                                                                                       | 3364    |
| 5   | limit 4 to yr="2011 -Current"                                                                                                                                                                                                                                                                                                                                                                                                                                                                                                                                                                                                                                                                                       | 396     |
